# Supplementary material
Source: Elsevier journal article supplement (https://www.sciencedirect.com/science/article/pii/S0211563820300432)
Supplement: mmc1 [file S0211563820300432:mmc1.pdf]

| ESTRUCTURA<br>BÁSICA DE SESIÓN                                                   | 1ª Semana                                                                                                                                                                                                                                                                                                                                                                                                                                                                                                                                                                                                      | 2ª Semana                                                                                                                                                                                                                                                                                                                                                                                                                                                                                                                                                                 | 3ª Semana                                                                                                                                                                                                                                                      | 4ª Semana                                                        | 5ª Semana                                                                                                                                                                                          | 6ª Semana                                                                                                                           | 7ª Semana                                                                                    | 8ª Semana                                                                                                                                                                                                                                                                                                                                                                                                                                                                                           |
|----------------------------------------------------------------------------------|----------------------------------------------------------------------------------------------------------------------------------------------------------------------------------------------------------------------------------------------------------------------------------------------------------------------------------------------------------------------------------------------------------------------------------------------------------------------------------------------------------------------------------------------------------------------------------------------------------------|---------------------------------------------------------------------------------------------------------------------------------------------------------------------------------------------------------------------------------------------------------------------------------------------------------------------------------------------------------------------------------------------------------------------------------------------------------------------------------------------------------------------------------------------------------------------------|----------------------------------------------------------------------------------------------------------------------------------------------------------------------------------------------------------------------------------------------------------------|------------------------------------------------------------------|----------------------------------------------------------------------------------------------------------------------------------------------------------------------------------------------------|-------------------------------------------------------------------------------------------------------------------------------------|----------------------------------------------------------------------------------------------|-----------------------------------------------------------------------------------------------------------------------------------------------------------------------------------------------------------------------------------------------------------------------------------------------------------------------------------------------------------------------------------------------------------------------------------------------------------------------------------------------------|
|                                                                                  | En bipedestación<br>Resistencia la gravedad (libres)                                                                                                                                                                                                                                                                                                                                                                                                                                                                                                                                                           | En bipedestación y sedestación<br>Resistencia la gravedad (libres)                                                                                                                                                                                                                                                                                                                                                                                                                                                                                                        | En bipedestación.<br>Resistencia la gravedad y banda elástica.                                                                                                                                                                                                 | IDEM semana anterior.                                            | IDEM semana anterior.                                                                                                                                                                              | IDEM semana anterior.                                                                                                               | IDEM semana anterior.                                                                        | En bipedestación.<br>Resistencia la gravedad, banda elástica y muñequeras lastradas.                                                                                                                                                                                                                                                                                                                                                                                                                |
| Calentamiento aeróbico de 5 minutos                                              |                                                                                                                                                                                                                                                                                                                                                                                                                                                                                                                                                                                                                |                                                                                                                                                                                                                                                                                                                                                                                                                                                                                                                                                                           |                                                                                                                                                                                                                                                                |                                                                  |                                                                                                                                                                                                    |                                                                                                                                     |                                                                                              |                                                                                                                                                                                                                                                                                                                                                                                                                                                                                                     |
| Trabajo Patrones FNP                                                             | -Punilat de ES D/I: B-A, con insp + P CC con ext y rot D/I.<br>-Punilat de ES D/I: A-B, con esp + P CC con flex y rot D/I.<br>-Punilat de ES D/I: D-C, con insp + P CC con ext y rot D/I.<br>-Punilat de ES D/I: C-D, con esp + P CC con flex y rot D/I.                                                                                                                                                                                                                                                                                                                                                       | IDEM semana anterior.                                                                                                                                                                                                                                                                                                                                                                                                                                                                                                                                                     | IDEM semana anterior.                                                                                                                                                                                                                                          | IDEM semana anterior.                                            | IDEM semana anterior.                                                                                                                                                                              | IDEM semana anterior.                                                                                                               | IDEM semana anterior.                                                                        | IDEM semana anterior.                                                                                                                                                                                                                                                                                                                                                                                                                                                                               |
| Desplazamientos de 3 min de recuperación                                         |                                                                                                                                                                                                                                                                                                                                                                                                                                                                                                                                                                                                                |                                                                                                                                                                                                                                                                                                                                                                                                                                                                                                                                                                           |                                                                                                                                                                                                                                                                |                                                                  |                                                                                                                                                                                                    |                                                                                                                                     |                                                                                              |                                                                                                                                                                                                                                                                                                                                                                                                                                                                                                     |
| Trabajo Patrones FNP                                                             | -Punilat de ES D/I: B-A, con flex codo e insp + P CC con ext y rot D/I.<br>-Punilat de ES D/I: A-B, con ext codo y esp + P CC con flex y rot D/I.<br>-Punilat de ES D/I: B-A, con ext codo e insp + P CC con ext y rot D/I.<br>-Punilat de ES D/I: A-B, con flex codo y esp + P CC con flex y rot D/I.<br>-Punilat de ES D/I: D-C, con ext codo e insp + P CC con ext y rot D/I.<br>-Punilat de ES D/I: C-D con flex codo y esp + P CC con flex y rot D/I.<br>-Punilat de ES D/I: D-C, con flex codo e insp + P CC con ext y rot D/I.<br>-Punilat de ES D/I: C-D con ext codo y esp + P CC con flex y rot D/I. | IDEM semana anterior.                                                                                                                                                                                                                                                                                                                                                                                                                                                                                                                                                     | IDEM semana anterior.                                                                                                                                                                                                                                          | IDEM semana anterior.                                            | IDEM semana anterior.                                                                                                                                                                              | IDEM semana anterior.                                                                                                               | IDEM semana anterior.                                                                        | IDEM semana anterior.                                                                                                                                                                                                                                                                                                                                                                                                                                                                               |
| Desplazamientos de 3 min de recuperación                                         |                                                                                                                                                                                                                                                                                                                                                                                                                                                                                                                                                                                                                |                                                                                                                                                                                                                                                                                                                                                                                                                                                                                                                                                                           |                                                                                                                                                                                                                                                                |                                                                  |                                                                                                                                                                                                    |                                                                                                                                     |                                                                                              |                                                                                                                                                                                                                                                                                                                                                                                                                                                                                                     |
| Trabajo Patrones FNP                                                             | -Pbilat simétr ES: D-C con flex codos e insp y C-D con ext codos y esp.<br>-Pbilat simétr ES: D-C con ext codos e insp y C-D con flex codos y esp.<br>-Pbilat simétr ES: B-A con flex codos e insp y A-B con ext codos y esp<br>-Pbilat simétr ES: B-A con ext codos e insp y A-B con flex codos y esp.                                                                                                                                                                                                                                                                                                        | IDEM semana anterior.                                                                                                                                                                                                                                                                                                                                                                                                                                                                                                                                                     | IDEM semana anterior.                                                                                                                                                                                                                                          | IDEM semana anterior.                                            | IDEM semana anterior.                                                                                                                                                                              | IDEM semana anterior.                                                                                                               | IDEM semana anterior.                                                                        | IDEM semana anterior.                                                                                                                                                                                                                                                                                                                                                                                                                                                                               |
| Desplazamientos de 3 min de recuperación                                         |                                                                                                                                                                                                                                                                                                                                                                                                                                                                                                                                                                                                                |                                                                                                                                                                                                                                                                                                                                                                                                                                                                                                                                                                           |                                                                                                                                                                                                                                                                |                                                                  |                                                                                                                                                                                                    |                                                                                                                                     |                                                                                              |                                                                                                                                                                                                                                                                                                                                                                                                                                                                                                     |
| Trabajo Patrones FNP                                                             | -Pbilat asimétr ES: D-C para ESD y B-A para ESI + P CC con ext y rot Iz, con insp.<br>-Pbilat asimétr ES: C-D para ESD y A-B para para ESI + P CC con ext y rot Dch, con esp.<br>-Pbilat asimétr ES: A-B para ESD y C-D para ESI; y P CC con flex y rot Iz, con esp.<br>-Pbilat asimétr ES: B-A para ESD y D-C para ESI; y P CC con ext y rot Dch, con la insp.<br>-Estiramiento individual estático adaptado, posición máxima de partida de cada P unilateral de ES, durante 5/7 seg; 5/7 seg de relajación; máx 4 rep.                                                                                       | En sedestación.<br>-P tronco sup con ext y rot Dch + P CC con ext y rot Dcha + P de hachar B-A para ESD (principal) y D-C para ESI (secundaria); con insp.<br>-P tronco sup con flex y rot Iz + P CC con flex y rot Iz + P de hachar A-B para ESD (principal) y C-D para ESI (secundaria); con esp.<br>-P tronco sup con ext y rot Iz + P CC con ext y rot Iz + P de hachar B-A para ESI (principal) y D-C para ESD (secundaria); con insp.<br>-P tronco sup con flex y rot Dch + P CC con flex y rot Dch + P de hachar A-B para ESI (principal) y C-D para ESD; con esp. | En Bipedestación y con banda elástica de resistencia extra suave (Theraband beige).<br>Día 1: 1 serie.<br>Día 2: 2 series<br>-Punilat de ES D/I: B-A e insp + P CC con ext y rot D/I.<br>-Punilat de ES D/I: C-D con ext codo y esp + P CC con flex y rot D/I. | IDEM semana anterior.<br><br>Día 1:3 series.<br>Día 2: 4 series. | IDEM semana anterior.<br>Día 1: 3 series<br>banda resistencia extra suave, 1 serie<br>banda suave<br>(Theraband amarillo).<br>Día 2: 2 series<br>banda resistencia suave, 2 series<br>banda suave. | IDEM semana anterior.<br>Día 1: 1 serie<br>banda resistencia extra suave, 3 serie<br>banda suave.<br>Día 2: 4 series<br>banda suave | IDEM semana anterior.<br>Día 1º: 5 series<br>banda suave<br>Día 2º: 6 series<br>banda suave. | IDEM semana anterior series con banda elástica.<br>Día 1: 5 series banda suave, 1 serie muñequeras lastradas 0,5 kg.<br>Día 2: 4 series banda suave, 2 series muñequeras lastradas 0,5 kg.<br>Ejercicios con muñequeras:<br>-Punilat de ES D/I: A-B y esp + P CC con flex y rot D/I.<br>-Punilat de ES D/I: B-A e insp + P CC con ext y rot D/I.<br>-Punilat de ES D/I: C-D con ext codo y esp + P CC con flex y rot D/I.<br>-Punilat de ES D/I D-C, con flex codo e insp + P CC con ext y rot D/I. |
| Estiramientos 7/8 minutos.                                                       |                                                                                                                                                                                                                                                                                                                                                                                                                                                                                                                                                                                                                |                                                                                                                                                                                                                                                                                                                                                                                                                                                                                                                                                                           |                                                                                                                                                                                                                                                                |                                                                  |                                                                                                                                                                                                    |                                                                                                                                     |                                                                                              |                                                                                                                                                                                                                                                                                                                                                                                                                                                                                                     |
| Desplazamientos de 3 minutos de enfriamiento activo y finalización de la sesión. |                                                                                                                                                                                                                                                                                                                                                                                                                                                                                                                                                                                                                |                                                                                                                                                                                                                                                                                                                                                                                                                                                                                                                                                                           |                                                                                                                                                                                                                                                                |                                                                  |                                                                                                                                                                                                    |                                                                                                                                     |                                                                                              |                                                                                                                                                                                                                                                                                                                                                                                                                                                                                                     |

P: patrón; Punilat: Patrón Unilateral; Pbilat: Patrón Bilateral; B-A: Diagonal B-A; A-B: Diagonal A-B; C-D: Diagonal C-D; D-C: Diagonal D-C  
ES: Extremidad Superior; ESD: Extremidad Superior Derecha; ESI: Extremidad Superior izquierda; CC: cabeza y cuello  
simétr: simétrico; asimétr: asimétrico; flex: flexión; ext: extensión; rot: rotación; D/I: Derecha/Izquierda; Dcha: Derecha; Iz: Izquierda  
insp: inspiración; esp: espiración; seg: segundos; min: minutos; rep: repetición
